# Supplementary material
Source: PubMed Central journal article supplement (PMC6078460)
Supplement: supp_RA118.002261_135788_1_supp_157620_pttl97.pdf [file supp_RA118.002261_135788_1_supp_157620_pttl97.pdf]

## Supporting information

**Table S1. Primers used for ChIP-qPCR.**

|       | Forward                  | Reverse                  |
|-------|--------------------------|--------------------------|
| iNOS  | GGA CTTGGGACCAGAAAGAGGTG | GCCATCCAGAGAGTTGTTTTTGC  |
| MMP3  | AAAATAGAGTAGCAGAGGCAGGTA | AGAGTGGTGGCAGTGATGTGAA   |
| MMP13 | CAACCATGGGGCTCAATCCT     | CTTACGTGGCGACTTTTTCTTTTC |

**Table S2. Primers used for quantitative RT-PCR.**

| Gene            | Forward              | Reverse              |
|-----------------|----------------------|----------------------|
| <i>iNOS</i>     | TGGCCATGGAACATCCCAA  | AGGATGTTGTAGCGCTGGAC |
| <i>MMP3</i>     | TGGGCCAGGGATTAATGGAG | CCGAGTCAGGTCTGTGAGTG |
| <i>MMP13</i>    | AGGAGCATGGCGACTTCTAC | AGACCTAAGGAGTGGCCGAA |
| <i>SOX9</i>     | GGAAGTCGGTGAAGAACGGG | CCTTGAAGATGGCGTTGGGG |
| <i>Col2a1</i>   | TGACACTGGGACTGTCCTCT | TCTCCGAAGGGGATCTCAGG |
| <i>Aggrecan</i> | CAGTCGAAACAGCCACCTCC | TCTGTCTCCTTGCAGGTCCC |
| <i>18S rRNA</i> | GTAACCCGTTGAACCCCAT  | CCATCCAATCGGTAGTAGCG |

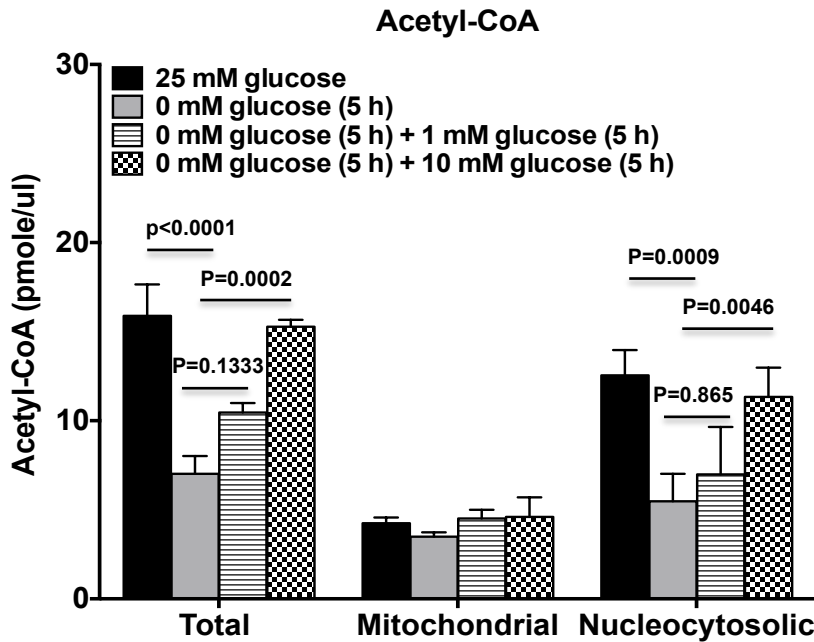

**Figure S1. Effect of glucose concentration on acetyl-CoA generation in chondrocytes.** Cultured primary human knee chondrocytes in DMEM media containing 25 mM glucose were subjected to glucose starvation in DMEM media without glucose for 5 hours, and then placed back in the DMEM media containing 1 or 10 mM glucose for 5 hours. The amounts of total and compartmental (mitochondrial and nucleocytosolic) acetyl-CoA were determined. Two-way ANOVA followed by Bonferroni's *post hoc* test was used for statistical data analysis. P values represent comparisons of the mean $\pm$ SD.
